# Supplementary material
Source: Research Square preprint supplement (doi:10.21203/rs.3.rs-9236665/v1)
Supplement: Supplementary file 1 [file 80913fabba924fefb8e3a700.docx]

| ***Table 1*** *demographic and clinical information (n = 289)* | | |
| --- | --- | --- |
|  | Values | N (%) / Mean ± SD |
| Age (Year) | - | 38.38 ± 9.27 |
| Duration of Disease (Year) | - | 9.88 ± 6.46 |
| Gender | Male | 65 (22.5%) |
| Female | 224 (77.5%) |
| Initial Sign of MS | Sensory Dysfunction | 103 (35.6%) |
| Visual Dysfunction | 92 (31.8%) |
| Cerebellar Dysfunction | 57 (19.7%) |
| Pyramidal Dysfunction | 26 (9.0%) |
| Others | 11 (3.8%) |
| Current Sign of MS | None | 135 (46.7%) |
| Pyramidal Dysfunction | 51 (17.6%) |
| Sensory Dysfunction | 45 (15.6%) |
| Cerebellar Dysfunction | 23 (8.0%) |
| Visual Dysfunction | 18 (6.2%) |
| Others | 17 (5.9%) |
| Current MS Medication | Rituximab | 162 (56.1%) |
| Ocrelizumab | 77 (26.6%) |
| Dimethyl fumarate | 11 (3.8%) |
| Fingolimod | 10 (3.5%) |
| Interferon beta-1a | 9 (3.1%) |
| Natalizumab | 7 (2.4%) |
| Glatiramer acetate | 6 (2.1%) |
| Azathioprine | 5 (1.7%) |
| Teriflunomide | 2 (0.7%) |
| Family History | Positive | 39 (13.5%) |
| Negative | 250 (86.5%) |
| Smoking | Positive | 28 (9.7%) |
| Negative | 261 (90.3%) |
| Education | under diploma | 36 (13.7%) |
| diploma | 84 (32.1%) |
| over diploma | 142 (54.2%) |
| Comorbidity | Hypothyroidism | 26 (9.0%) |
| Hypertension | 13 (4.5%) |
| Anemia | 5 (1.7%) |
| Dyslipidemia | 5 (1.7%) |
| Chronic Heart Failure | 4 (1.4%) |
| Diabetes Mellitus | 4 (1.4%) |
| Asthma | 4 (1.4%) |
| Migraine | 4 (1.4%) |

| ***Table 2*** *Statistical description of sleep disorders, fatigue and QoL (n = 289)* | | |
| --- | --- | --- |
|  | Values | N (%) / Mean ± SD |
| OSA [Berlin] | Low risk | 251 (86.9%) |
| High risk | 38 (13.1%) |
| RLS [IRLSQ] | None | 188 (65.1%) |
| Mild | 23 (8.0%) |
| Moderate | 51 (17.6%) |
| Severe | 20 (6.9%) |
| Very severe | 7 (2.4%) |
| Insomnia [ISI] | No insomnia | 177 (61.2%) |
| Subthreshold insomnia | 77 (26.6%) |
| Moderate clinical insomnia | 30 (10.4%) |
| Severe clinical insomnia | 5 (1.7%) |
| Fatigue [FSS] | Not fatigued | 177 (61.2%) |
| Fatigued | 112 (38.8%) |
| Fatigue [MFIS] | - | 18.69 ± 18.01 |
| physical quality of life [MSQoL54- PHC] | - | 58.80 ± 9.91 |
| mental quality of life [MSQoL54- MHC] | - | 61.05 ± 15.39 |

| ***Table 3*** *demographic and clinical data across different EDSS scores* | | | | | |
| --- | --- | --- | --- | --- | --- |
|  | Subjective EDSS Categorized | | | | |
|  | 0 - 4 | 4.5 - 5.5 | 6 - 6.5 | Total Population | P Value |
| Number of Cases | 171 | 27 | 29 | 227 | - |
| Female/Male | 2.42 | 3.50 | 4.80 | 2.72 | 0.482 |
| Hypothyroidism | 8.8% | 7.4% | 13.8% | 9.3% | 0.348 |
| Hypertension | 5.3% | 3.7% | 3.4% | 4.8% | 0.186 |
| Family History | 15.2% | 14.8% | 6.9% | 14.1% | 0.296 |
| Smoking | 8.8% | 3.7% | 10.3% | 8.4% | 0.356 |
| Age (Years) | 36.4 ± 9.2 | 44.0 ± 9.4 | 44.1 ± 7.0 | 38.3 ± 9.5 | **0.027** |
| Duration of MS (Years) | 8.4 ± 6.2 | 13.7 ± 7.4 | 14.1 ± 5.6 | 9.8 ± 6.7 | 0.311 |
| Years of Education | 14.0 ± 3.1 | 11.9 ± 3.1 | 13.4 ± 3.9 | 13.7 ± 3.3 | 0.811 |
| Body Mass Index | 24.5 ± 4.0 | 26.3 ± 6.5 | 24.3 ± 5.5 | 24.7 ± 4.6 | 0.899 |
| MFIS score | 13.2 ± 12.6 | 20.1 ± 19.0 | 22.4 ± 17.2 | 15.2 ± 14.5 | **0.030** |
| MSQOL54 - Physical Health Composite Score | 62.7 ± 7.5 | 54.6 ± 9.3 | 46.4 ± 7.7 | 59.7 ± 9.6 | **<.001** |
| MSQOL54 - Mental Health Composite Score | 63.4 ± 13.8 | 57.1 ± 16.3 | 53.4 ± 17.7 | 61.4 ± 15.0 | 0.513 |
| *Significant values (P Value < 0.05) have been written in bold* | | | | | |

| ***Table 4*** *Risk factors of sleep disorders* | | | | | | | | | |
| --- | --- | --- | --- | --- | --- | --- | --- | --- | --- |
|  |  | Model fitting | Sex | Age | Age of MS onset | Hypothyroidism | Hypertension | Smoking | Family History |
| Berlin | P Value | **<.001** | 0.851 | **0.002** | 0.821 | 0.879 | **0.008** | **<.001** | 0.208 |
| odd ratio |  | 0.92 | 1.07 | 1.01 | 1.10 | 5.40 | 6.84 | 1.82 |
| IRLSQ | P Value | **<.001** | **0.002** | **<.001** | 0.051 | 0.620 | 0.927 | 0.118 | 0.425 |
| odd ratio |  | 0.31 | 1.08 | 0.96 | 0.81 | 1.06 | 2.04 | 0.74 |
| ISI | P Value | **<.001** | **0.008** | **<.001** | **0.024** | 0.446 | 0.862 | **0.048** | 0.145 |
| odd ratio |  | 0.39 | 1.09 | 0.95 | 1.36 | 1.11 | 2.36 | 1.64 |
| *- Significant values (P Value < 0.05) have been written in bold  - For calculating odd ratio of dichotomous variables with true/false nature (Hypothyroidism, Hypertension, Smoking, Family History) the "negative" value was considered as reference category. (e.g. odd ratio of 6.84 in Berlin-Smoking cell means the participants who smoked had a x6.84 times higher chance of having high risk of OSA) for the sex variable "female" was considered as reference category.* | | | | | | | | | |

| ***Table 5*** *effect sizes of sleep disorders on fatigue and QoL* | | | |
| --- | --- | --- | --- |
|  | Berlin | IRLSQ | ISI |
| MFIS | 0.111 | 0.254 | **0.387** |
| MSQoL54-Physical Health Composite score | 0.077 | 0.080 | **0.199** |
| MSQoL54-Mental Health Composite scores | 0.041 | 0.088 | **0.261** |
| *reported values are Eta squared (η 2)* | | | |

| ***Table 6*** *Correlation Between Each Sleep Disorder, Fatigue and Quality of Life* | | | | | | | |
| --- | --- | --- | --- | --- | --- | --- | --- |
|  | 1 | 2 | 3 | 4 | 5 | 6 | 7 |
| 1. BERLIN | - |  |  |  |  |  |  |
| 2. IRLSQ | .169** | - |  |  |  |  |  |
| 3. ISI | .270** | .287** | - |  |  |  |  |
| 4. MFIS | .305** | .417** | .546** | - |  |  |  |
| 5. FSS | .195** | .398** | .447** | .750** | - |  |  |
| 6. MSQoL54-PHC | -.252** | -.250** | -.391** | -.501** | -.372** | - |  |
| 7. MSQoL54-MHC | -.206** | -0.091 | -.404** | -.557** | -.407** | .452** | - |
| **. Correlation is significant at the 0.01 level (2-tailed). | | | | | | | |

| ***Table 7*** *Multiple Linear Regression Predicting Quality of Life* | | | | | | |
| --- | --- | --- | --- | --- | --- | --- |
|  | Variable | *B* | *SE* | *95% CI* | *β* | *p* |
| MSQoL54-PHC | Constant | 63.872 | 0.769 | [62.359, 65.385] | - | **<.001** |
| BERLIN | -4.136 | 1.625 | [-7.335, -0.937] | -0.140 | **0.011** |
| IRLSQ | -0.071 | 0.060 | [-0.189, 0.047] | -0.068 | 0.236 |
| ISI | -0.615 | 0.096 | [-0.805, -0.426] | -0.379 | **<.001** |
| MSQoL54-MHC | Constant | 69.006 | 1.192 | [66.659, 71.352] | - | **<.001** |
| BERLIN | -3.109 | 2.520 | [-8.070, 1.851] | -0.068 | 0.218 |
| IRLSQ | 0.045 | 0.093 | [-0.137, -0.228] | 0.028 | 0.625 |
| ISI | -1.187 | 0.149 | [-1.481, -0.893] | -0.470 | **<.001** |
| *- MSQoL54-PHC : R2 = .226, F(3, 284) = 27.705, p<.001  - MSQoL54-MHC : R2 = .234, F(3, 284) = 28.874, p<.001* | | | | | | |
